# Supplementary material for: Proinflammatory Pathways Are Activated in the Human Q344X Rhodopsin Knock-In Mouse Model of Retinitis Pigmentosa
Source: MDPI journal article supplement (doi:10.3390/biom11081163), 2021-08-06
Supplement: s1 [file s1]

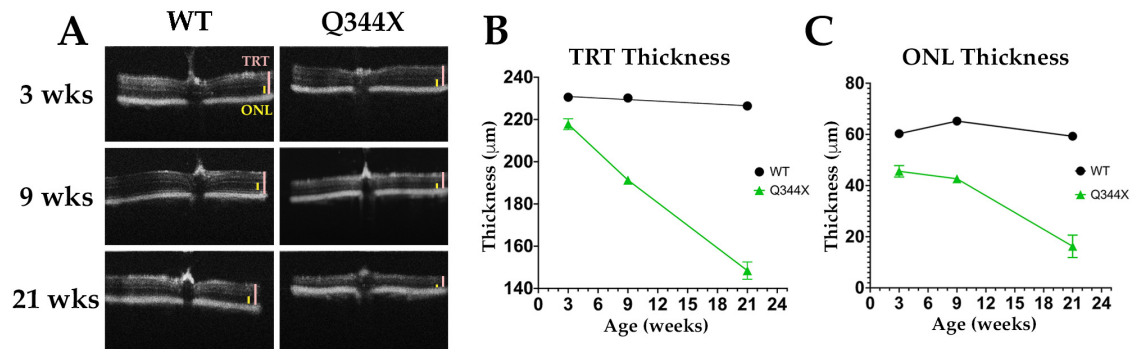

**Supplementary Figure 1. Q344X rhodopsin knock-in mouse retinas degenerate rapidly by OCT.** **A)** OCT images of WT and Q344X rhodopsin knock-in mouse retinas through the optic nerve head at 3, 9, and 21 weeks of age. ONL thickness shown by yellow caliper. Total retinal thickness (TRT) shown by pink caliper. **B)** Graphical representation of TRT (WT, black circles; Q344X, green triangles). **C)** Graphical representation of ONL thickness (WT, black circles; Q344X, green triangles). Error bars =  $\pm$ SD.

**Figure S1. Q344X rhodopsin knock-in mouse retinas degenerate rapidly by OCT.**

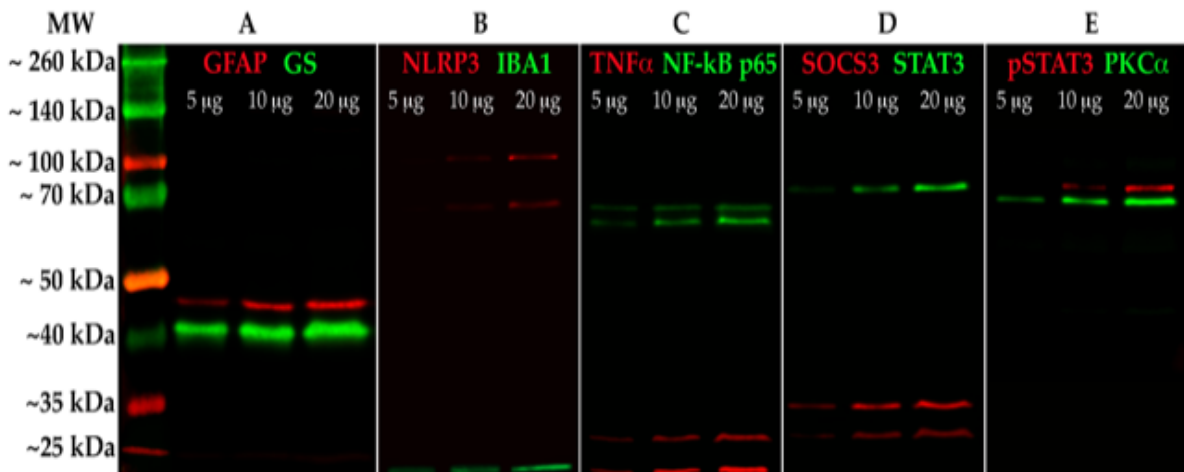

**Supplementary Figure 2. Western blot analyses of quantitated fIHC probed proteins.** Q344X mouse retinas at 6 weeks of age were extracted, sonicated in RIPA buffer, and 5, 10, and 20  $\mu\text{g}$  of protein electrophoresed in sequential wells. Blots were probed with the same antibodies used for fIHC to confirm specificity. **A)** GFAP (red), GS (green); **B)** NLRP3 (red), IBA1 (green); **C)** TNF $\alpha$  (red), NF- $\kappa$ B p65 (green); **D)** SOCS3 (red), STAT3 (green); **E)** pSTAT3 (red), PKC $\alpha$  (green). MW = molecular weight in kiloDaltons.

**Figure S2. Western blot analyses of quantitated fIHC probed proteins.**

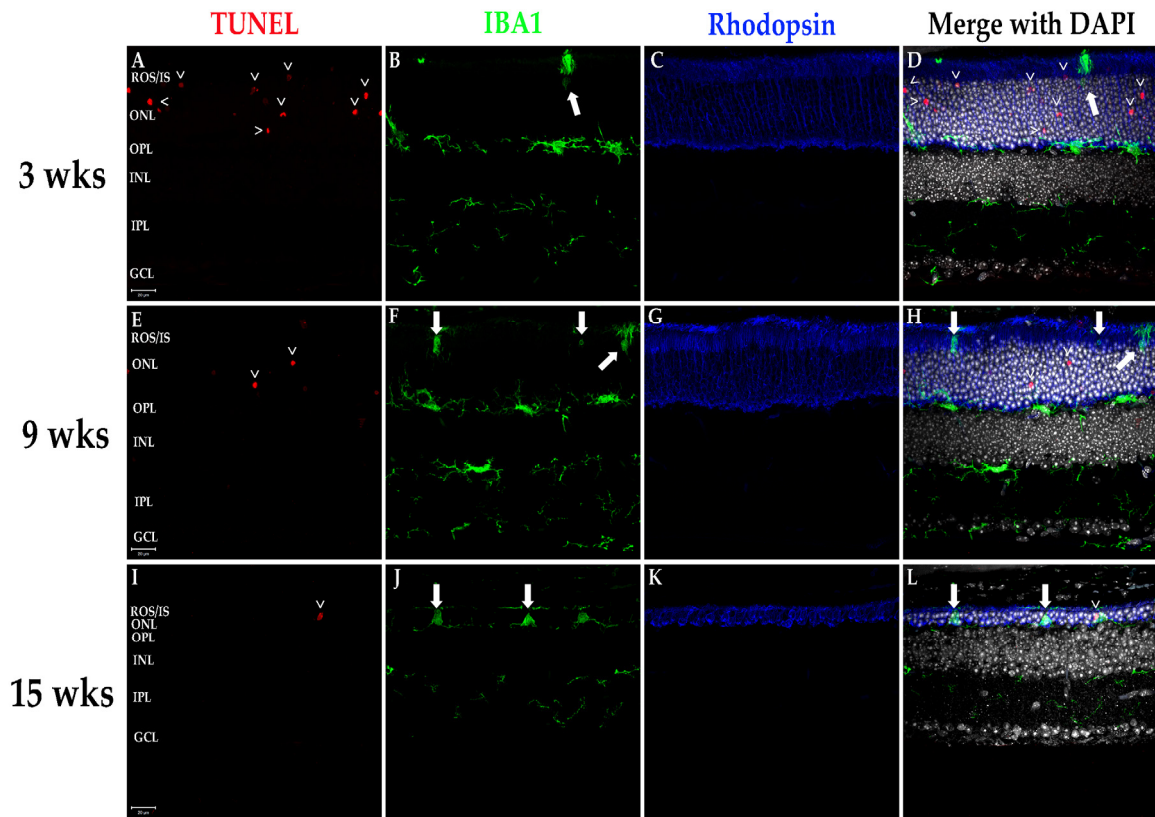

**Supplementary Figure 3. TUNEL positive apoptotic cells and microglial phagoptosis of non-apoptotic cells.** Q344X knock-in mouse retinal sections at 3 weeks (A-D), 9 weeks (E-H), and 15 weeks of age (I-L) were TUNEL-labeled (red) and immunolabeled for IBA1 (green) and rhodopsin (blue). Nuclei were labeled with DAPI (white). ROS/IS, rod outer segments/inner segments; ONL, outer nuclear layer; OPL, outer plexiform layer; INL, inner nuclear layer; IPL, inner plexiform layer; GCL, ganglion cell layer. Arrowheads (>) indicate apoptosing cells. Arrows indicates phagoptosis (aberrant phagocytosis of living cells by microglia). Scale bars = 20  $\mu$ m.

**Figure S3. TUNEL positive apoptotic cells and microglial phagoptosis of non-apoptotic cells.**

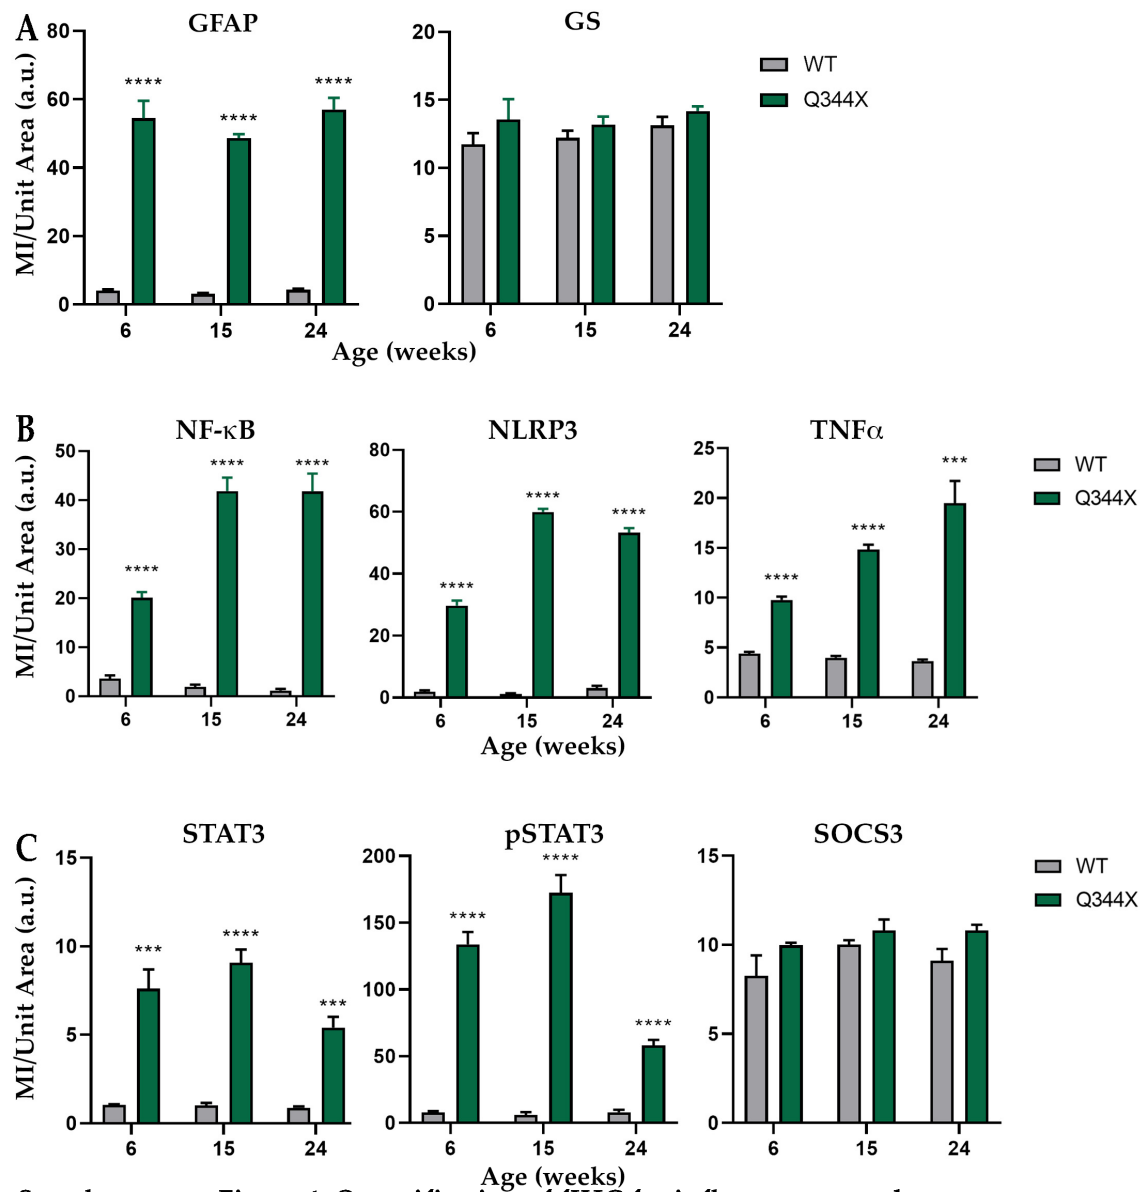

**Supplementary Figure 4. Quantification of fIHC for inflammatory pathway components.**

Using ImageJ, mean intensity (MI) per unit area in arbitrary units (a.u.) was assessed for fIHC labeling of GFAP and GS (A); NF-κB, NLRP3, and TNFα (B); and STAT3, pSTAT3, and SOCS3 (C) in WT (grey) and Q344X (green) mouse retinas. Error bars =  $\pm$ SEM. \*\*\*,  $p < 0.0001$ ; \*\*\*\*,  $p < 0.00001$ .

**Figure S4. Quantification of fIHC for inflammatory pathway components.**
